# Supplementary material
Source: PubMed Central journal article supplement (PMC10645550)
Supplement: mmc1.pdf [file mmc1.pdf]

**Supplemental information**

**Rare *de novo* gain-of-function missense variants  
in *DOT1L* are associated with developmental  
delay and congenital anomalies**

**Zelha Nil, Ashish R. Deshwar, Yan Huang, Scott Barish, Xi Zhang, Sanaa Choufani, Polona Le Quesne Stabej, Ian Hayes, Patrick Yap, Chad Haldeman-Englert, Carolyn Wilson, Trine Prescott, Kristian Tveten, Arve Vølle, Devon Haynes, Patricia G. Wheeler, Jessica Zon, Cheryl Cytrynbaum, Rebekah Jobling, Moira Blyth, Siddharth Banka, Alexandra Afenjar, Cyril Mignot, Florence Robin-Renaldo, Boris Keren, Oguz Kanca, Xiao Mao, Daniel J. Wegner, Kathleen Sisco, Marwan Shinawi, Undiagnosed Disease Network, Michael F. Wangler, Rosanna Weksberg, Shinya Yamamoto, Gregory Costain, and Hugo J. Bellen**

# SUPPLEMENTAL INFORMATION

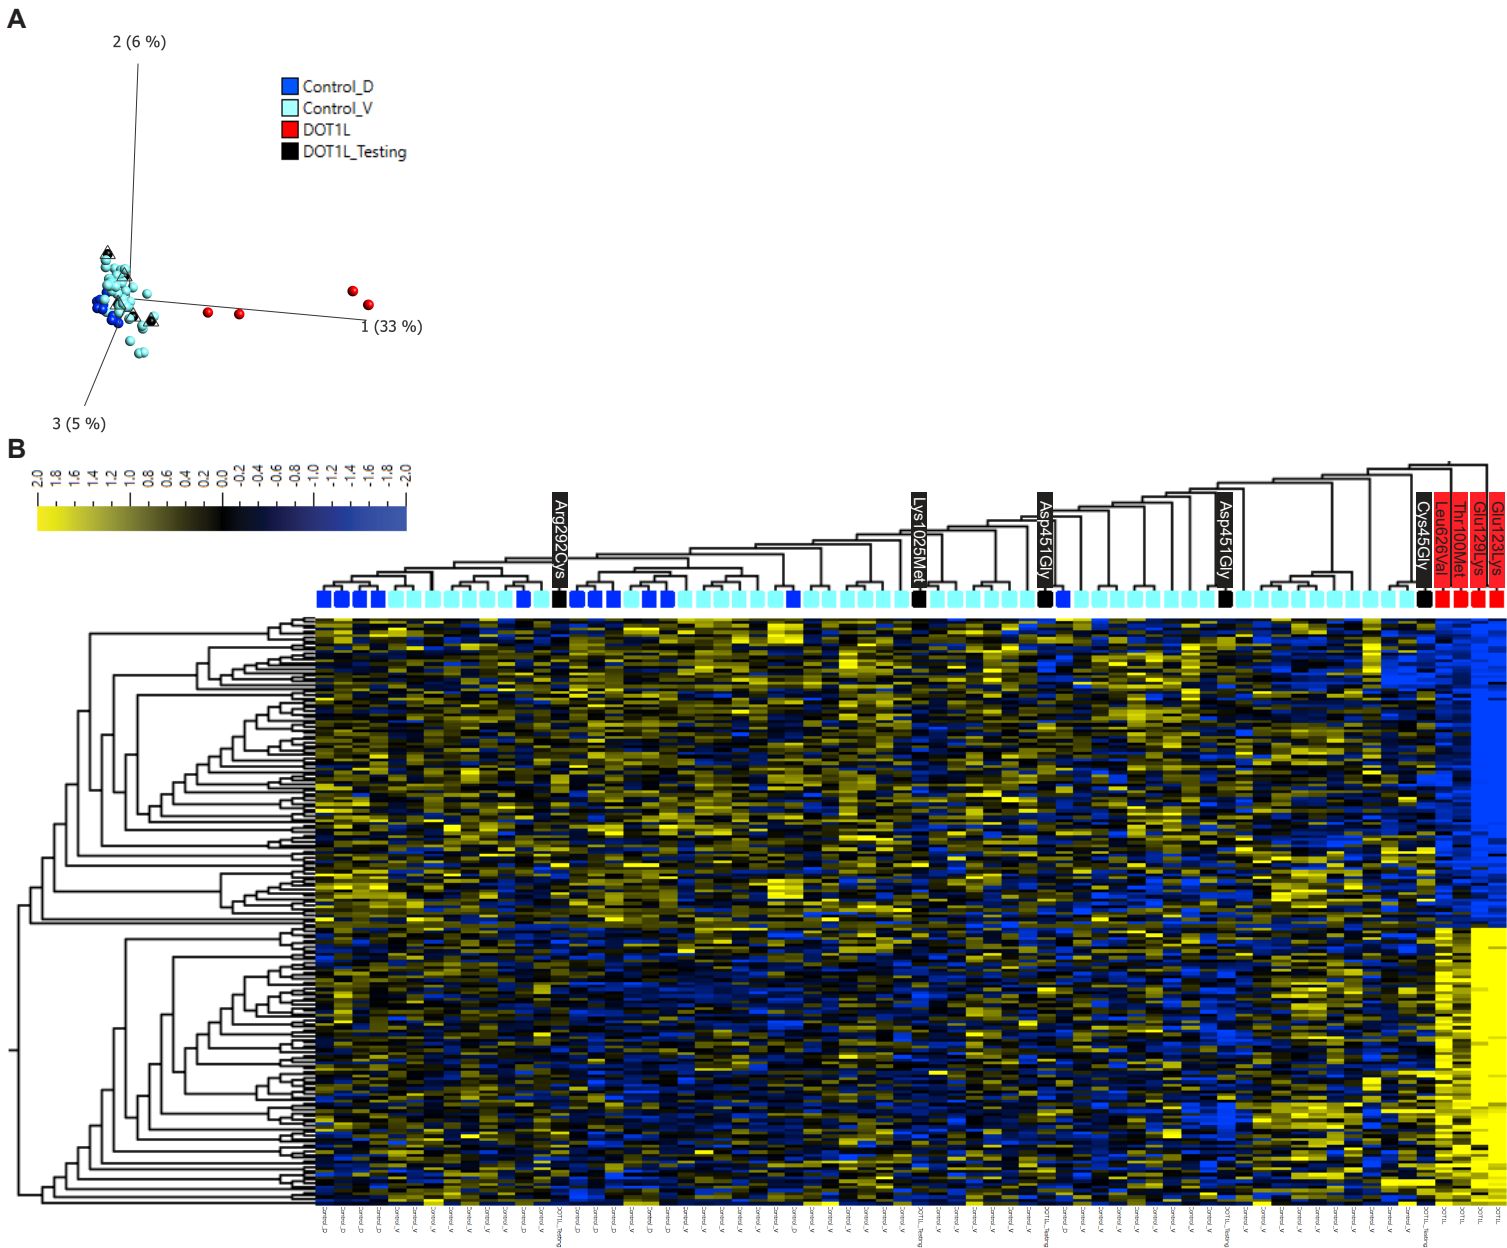

**Figure S1. DNA methylation profile of proband blood samples**

(A) Principal component analysis (PCA) and (B) heatmap showing clustering of the useable DOT1L samples (red) and matched control samples (blue) using DNAm values at the 185 CpG sites associated with a distinct DOT1L specific DNAm profile. The heatmap color gradient indicates the normalized DNAm value ranging from  $-2.0$  (blue) to  $2.0$  (yellow). Euclidean distance metric is used in the heatmap clustering dendrograms. Please see Table S9 for significantly enriched CpG sites.

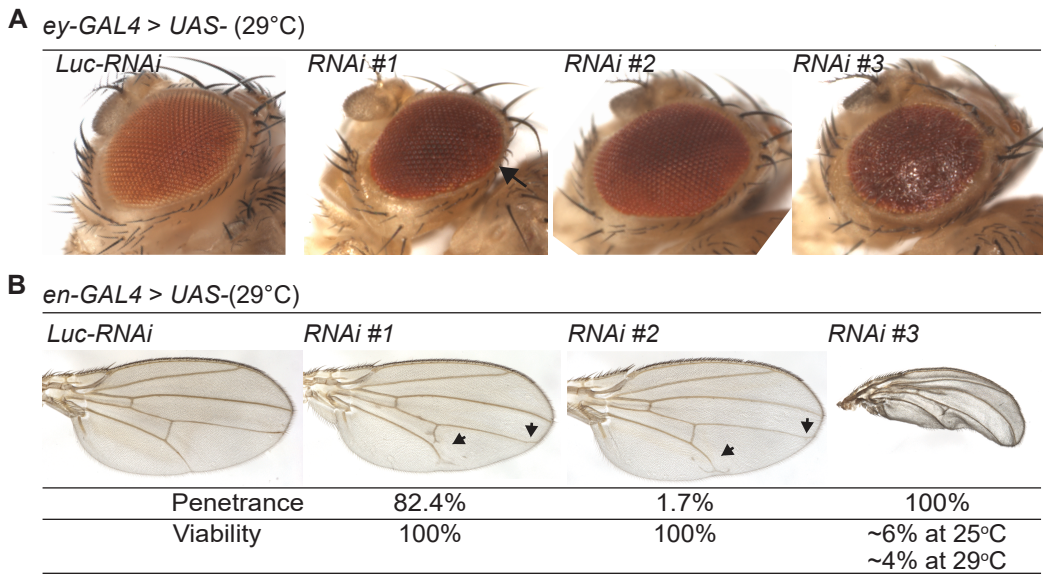

**Figure S2. Tissue specific knockdown of *gpp* causes eye and wing phenotypes**

(A) Eye specific knockdown of *gpp* causes a rough eye phenotype. *Ey-GAL4 > gpp-RNAi #1* causes a mild phenotype in a region of the eye indicated with an arrow. *Ey-GAL4 > RNAi #3* causes a severe phenotype in the whole eye. *Ey-GAL4 > RNAi #2* does not cause any phenotype. All the crosses were performed at 29°C. (ey: eyeless)

(B) Knockdown of *gpp* in developing tissues causes wing phenotypes and lethality. *en-GAL4 > gpp-RNAi #1* causes cross vein branching with a penetrance of 82.4%. *en-GAL4 > RNAi #3* causes lethality and the survivors have a severe phenotype in the whole wing with a full penetrance. *en-GAL4 > RNAi #2* causes vein branching phenotype with a very low penetrance. All the crosses were performed at 29°C. (en: engrailed)

|                                |                             |
|--------------------------------|-----------------------------|
|                                | <i>gpp<sup>TG4</sup>/Df</i> |
| <i>UAS-DOT1L<sup>*/+</sup></i> | (18, 25 & 29°C)             |
| *Reference                     | Lethal                      |
| *p.Cys45Gly                    | Lethal                      |
| *p.Thr100Met                   | Lethal                      |
| *p.Glu123Lys                   | Lethal                      |
| *p.Glu129Lys                   | Lethal                      |
| *p.Arg292Cys                   | Lethal                      |
| *p.Leu626Val                   | Lethal                      |
| *p.Lys1025Met                  | Lethal                      |
| <b><i>GR<sup>gpp</sup></i></b> | <b>Viable</b>               |

**Figure S3. Human reference or variant *DOT1L* fails to rescue lethality**

Expression of reference or variant *DOT1L* in *gpp<sup>TG4</sup>/Df* flies failed to rescue the lethality at all temperatures (18°C, 25°C and 29°C) tested while reintroduction of GR construct fully rescued lethality.

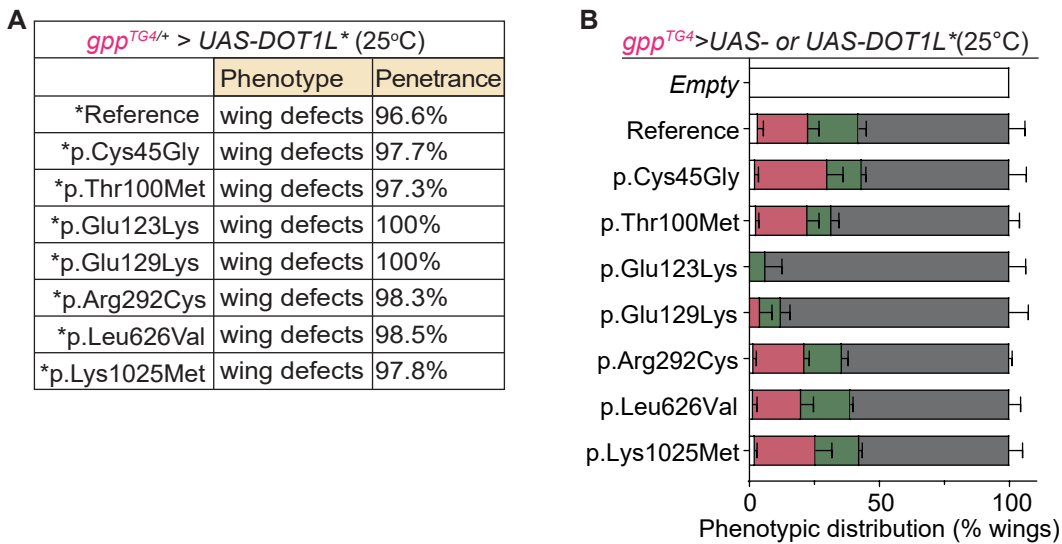

**Figure S4. Expression of reference or variant DOT1L in *gpp* expressing cells causes wing deformities**

(A) Survivors of heterozygous mutant flies, *gpp<sup>TG4/+</sup>*, expressing reference or variant *DOT1L* cDNA show morphological wing defects such as whole wing blistering, necrosis, loss of cross-veins and extra vein branching with penetrance levels >95%.

(B) The distribution of different wing phenotypes in survivors of heterozygous mutant flies, *gpp<sup>TG4/+</sup>*, expressing each *DOT1L* cDNA.

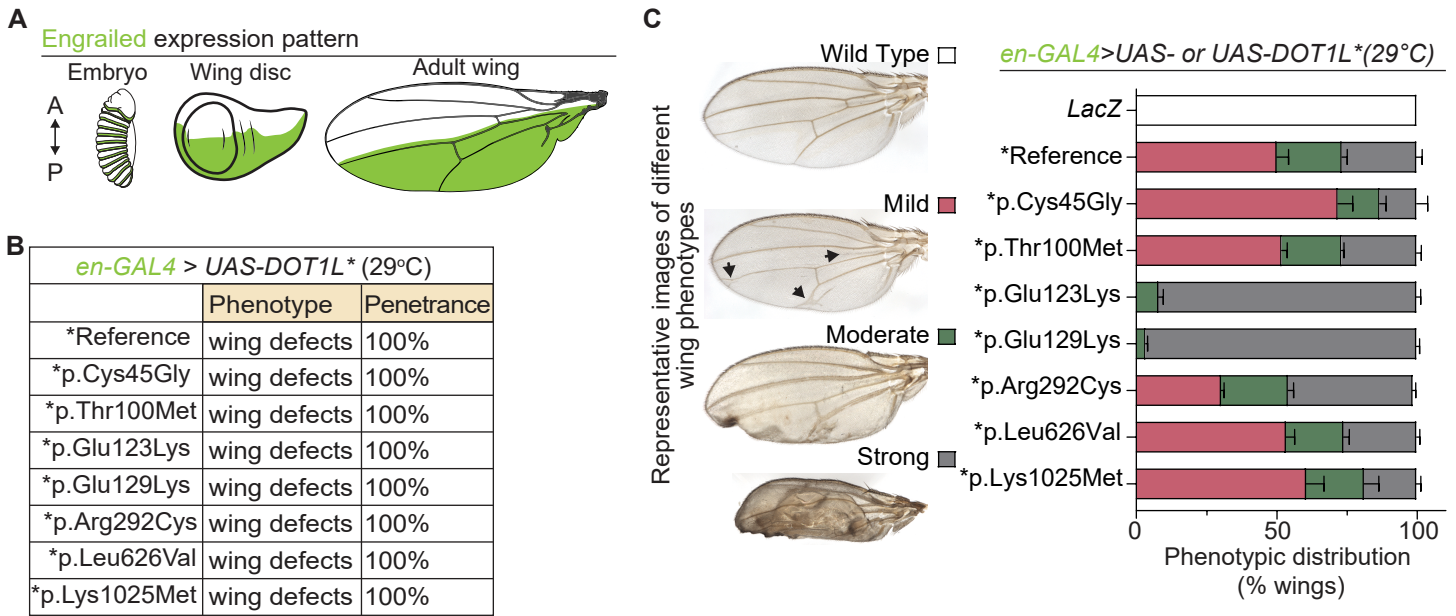

**Figure S5. Expression of reference or variant DOT1L in developing tissues causes wing deformities**

(A) Schematic of engrailed expression from embryos to larval wing disc and adult wings.

(B) *en-GAL4 > UAS-DOT1L* reference or variant expressing flies show morphological wing defects such as whole wing blistering, necrosis, loss of cross-veins and extra vein branching. (en: engrailed)

(C) Representative images of different wing phenotypes (left panel) and the distribution of different wing phenotypes in *en-GAL4 > UAS-DOT1L* reference or variant expressing flies (right panel).

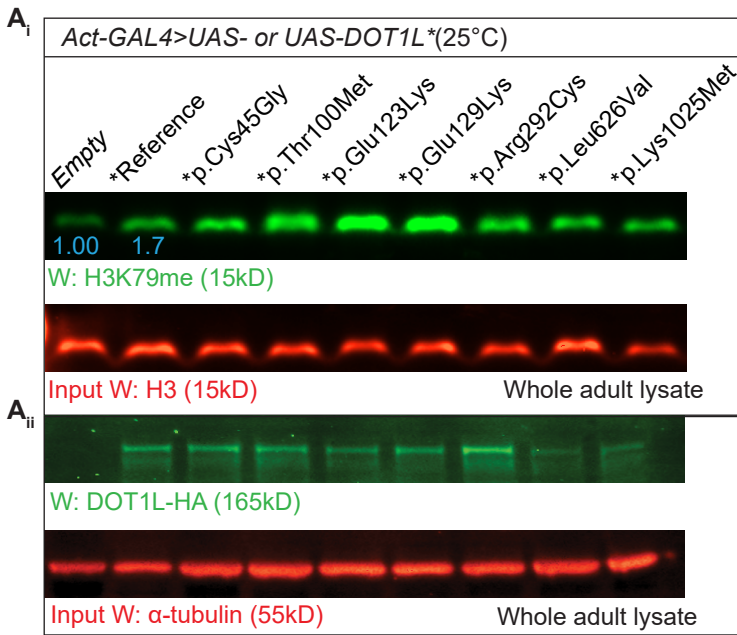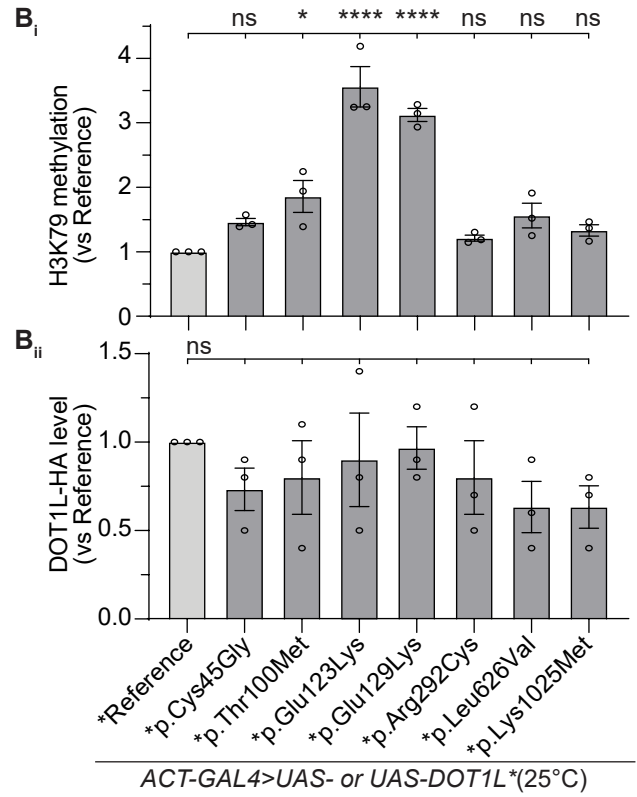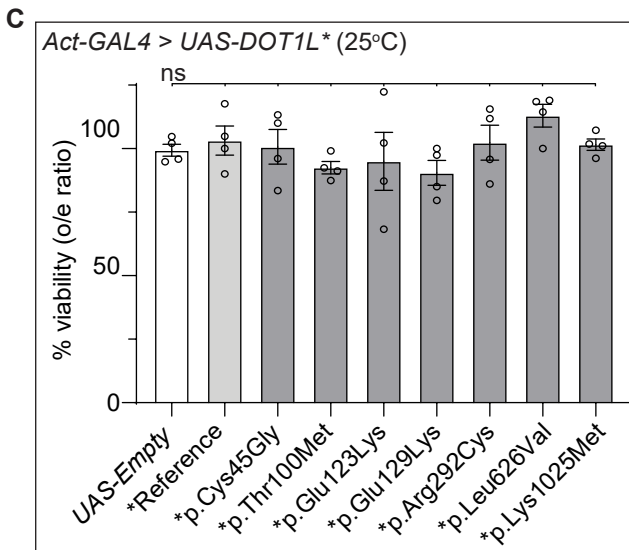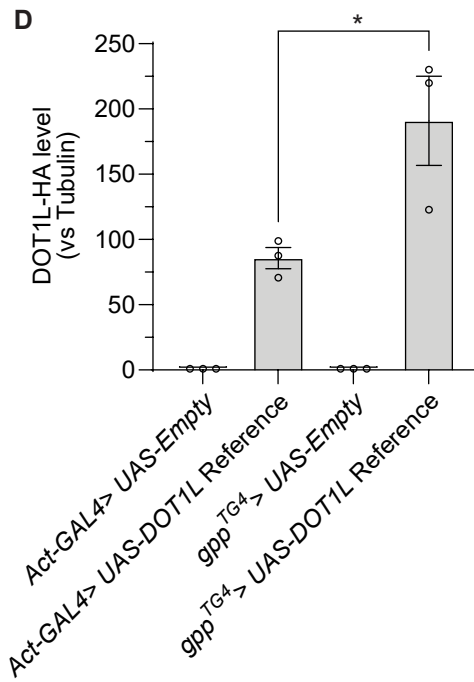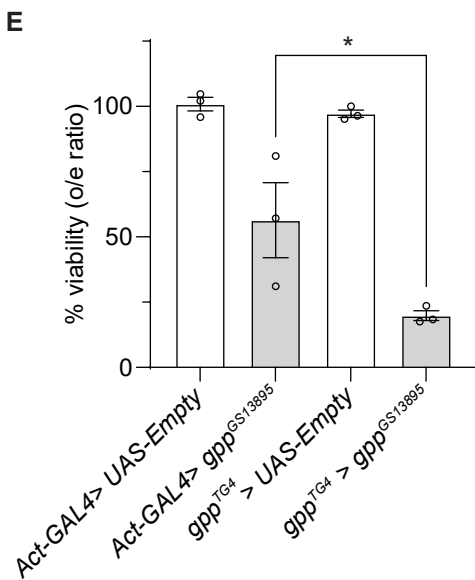

## Figure S6. H3K79 methylation pattern of flies ubiquitously expressing human DOT1L and variants

(A<sub>i</sub>) H3K79 methylation levels and (A<sub>ii</sub>) DOT1L levels in flies ubiquitously expressing reference or variant *DOT1L* cDNAs. Flies expressing reference *DOT1L* show increased H3K79 methylation compared to control flies (*Act-GAL4 > UAS-Empty*). Protein lysate from 10 adult flies were prepared for each sample. H3K79 methylation levels were normalized with loading control, H3, and fold change for each sample were calculated by comparing normalized H3K79 methylation levels to reference *DOT1L* expressing flies. DOT1L levels were normalized with loading control,  $\alpha$ -tubulin, and fold change for each sample were calculated by comparing normalized DOT1L levels to reference *DOT1L* expressing flies. All the crosses were performed at 25°C. Blue numbers indicate the fold change of H3K79 methylation level in reference when compared to control (*UAS-Empty*).

(B<sub>i</sub>) Normalized H3K79 methylation band intensities for each group from three independent experiments were plotted as mean  $\pm$  SEM, and statistical significance was determined by one-way ANOVA for multiple groups (\*  $p < 0.05$ , \*\*\*\*  $p < 0.0001$ ). (B<sub>ii</sub>) Normalized DOT1L band intensities for each group from three independent experiments were plotted as mean  $\pm$  SEM, and statistical significance was determined by one-way ANOVA for multiple groups.

(C) Percent viability of flies ubiquitously (*Act-GAL4*) expressing reference or variant *DOT1L* cDNAs. All the crosses were performed at 25°C. Percent viabilities (o/e ratios) from three independent experiments were plotted as mean  $\pm$  SEM, and statistical significance was determined by one-way ANOVA for multiple groups.

(D) Expression of DOT1L cDNA in gpp expression domains using gppTG4 results in higher protein levels than ubiquitous expression of DOT1L using *Act-GAL4* driver. Normalized DOT1L band intensities for control (*UAS-empty*) and *UAS-DOT1L-Reference* from three independent experiments (Figure 4E and Figure S6A) were plotted as mean  $\pm$  SEM, and statistical significance was determined by one-way ANOVA for multiple groups.

(E) Percent viability of flies expressing fly gpp (gppGS13895) ubiquitously (*Act-GAL4*) or in gpp expression domains (gppTG4). All the crosses were performed at 25°C. Percent viabilities (o/e ratios) from three independent experiments were plotted as mean  $\pm$  SEM, and statistical significance was determined by one-way ANOVA for multiple groups (\*  $p < 0.05$ ).



**Table S2. Details on match outcomes from Genematcher for *DOT1L* from October 2017 to June 2019**

| <b>Event Type</b>    | <b>Date of Match</b>             | <b>Country of Clinician/Individual</b> | <b>Outcome</b>                    | <b>Variant</b>          | <b>Sample Provided for DNAm Profiling</b> |
|----------------------|----------------------------------|----------------------------------------|-----------------------------------|-------------------------|-------------------------------------------|
| Original individual  | N/A                              | Canada                                 | Included in study                 | c.133T>G, p.Cys45Gly    | Yes*                                      |
| Previously published | N/A                              | England                                | Included in study                 | c.874C>T, p.Arg292Cys   | Yes                                       |
| Match                | October 17 <sup>th</sup> 2017    | Netherlands                            | No response                       | -                       | -                                         |
| Match                | October 17 <sup>th</sup> 2017    | Netherlands                            | No response                       | -                       | -                                         |
| Match                | October 17 <sup>th</sup> , 2017  | France                                 | No response                       | -                       | -                                         |
| Match                | October 17 <sup>th</sup> , 2017  | USA                                    | Included in study                 | c.299C>T, p.Thr100Met   | Yes                                       |
| Match                | December 5 <sup>th</sup> , 2017  | USA                                    | No response after initial contact | [frameshift variant]    | -                                         |
| Match                | December 19 <sup>th</sup> , 2017 | USA                                    | Included in study                 | c.1352A>G, p.Asp451Gly  | Yes (for both family members)             |
| Match                | March 19 <sup>th</sup> , 2018    | USA                                    | Included in study                 | c.367G>A, p.Glu123Lys   | Yes                                       |
| Match                | May 7 <sup>th</sup> , 2018       | France                                 | Included in study                 | c.385G>A, p.Glu129Lys   | Yes                                       |
| Match                | May 7 <sup>th</sup> , 2018       | France                                 | Included in study                 | c.3074A>T, p.Lys1025Met | Yes*                                      |
| Match                | July 18 <sup>th</sup> , 2018     | New Zealand                            | Included in study                 | c.367G>A, p.Glu123Lys   | No (not available; individual deceased)   |
| Match                | June 11 <sup>th</sup> 2019       | Norway                                 | Included in study                 | c.1876C>G, p.Leu626Val  | Yes                                       |

\*not utilized in analysis due to lack of age matched controls

**Table S3. Sequencing methods for individuals with *DOT1L* variants**

| <b>Proband</b>                            | <b>1</b>                                         | <b>2</b>                                               | <b>3 NZ</b>                                | <b>4 Ch</b>             | <b>5 OR</b>               | <b>6</b>                                                      | <b>7</b>                                   | <b>8</b>                 | <b>9</b>                                                      | <b>10</b>                                                                       | <b>11</b>                |
|-------------------------------------------|--------------------------------------------------|--------------------------------------------------------|--------------------------------------------|-------------------------|---------------------------|---------------------------------------------------------------|--------------------------------------------|--------------------------|---------------------------------------------------------------|---------------------------------------------------------------------------------|--------------------------|
| <b><i>DOT1L</i> variant (NM-032482.3)</b> | c.133T>G<br>p.Cys45Gly                           | c.299C>T<br>p.Thr100Met                                | c.367G>A<br>p.Glu123Lys                    | c.367G>A<br>p.Glu123Lys | c.367G>A<br>p.Glu123Lys   | c.385G>A<br>p.Glu129Lys                                       | c.1876C>G<br>p.Leu626Val                   | c.2557C>T<br>p.Arg853Cys | c.3074A>T<br>p.Lys1025Met                                     | c.874C>T<br>p.Arg292Cys                                                         | c.1352A>G<br>p.Asp451Gly |
| <b>Sequencing approach</b>                | Trio genome sequencing                           | Trio genome sequencing                                 | Singleton exome sequencing                 | Whole exome sequencing  | Trio exome sequencing     | Trio exome sequencing                                         | Trio exome sequencing                      | Whole exome sequencing   | Trio exome sequencing                                         | Trio exome sequencing                                                           | Trio exome sequencing    |
| <b>Capture reagent</b>                    | -                                                | N/A                                                    | SOPHiA Genetics Clinical Exome Solution v1 | N/A                     | GeneDx Proprietary System | Roche SeqCap EZ MedExome                                      | Nextera Rapid Capture Exome Kit (Illumina) | N/A                      | Roche SeqCap EZ MedExome                                      | SureSelect RNA baits (Agilent)                                                  | N/A                      |
| <b>Sequencer</b>                          | HiSeq X platform (Illumina Inc)                  | HiSeq X platform (Illumina Inc)                        | Illumina Inc                               | N/A                     | Illumina Inc              | Illumina NextSeq 500                                          | NextSeq 500 (Illumina)                     | N/A                      | Illumina NextSeq 500                                          | Illumina HiSeq                                                                  | N/A                      |
| <b>Location of Sequencing</b>             | The Center for Applied Genomics, Toronto, Canada | HudsonAlpha Clinical Services Lab, Huntsville, Alabama | SOPHiA GENETICS                            | N/A                     | GeneDx                    | Genetic laboratory, Pitié-Salpêtrière Hospital, Paris, France | Telemark Hospital Trust, Skien, Norway     | N/A                      | Genetic laboratory, Pitié-Salpêtrière Hospital, Paris, France | Genetics services of the UK National Health Service and the Republic of Ireland | N/A                      |
| <b>Publication of Sequencing Methods</b>  | PMID: 32960281                                   | -                                                      | -                                          | -                       | -                         | PMID: 31580924                                                | PMID: 26534809                             | -                        | PMID: 31580924                                                | PMID: 28135719                                                                  | -                        |

**Table S4. Publicly available fly lines used in this study**

| <b>Fly Line</b>               | <b>Genotype</b>                                                                          | <b>BDSC #</b>   |
|-------------------------------|------------------------------------------------------------------------------------------|-----------------|
| <i>gpp</i> <sup>xxv</sup>     | <i>In(3R)gppXXV, gppXXV/TM3, P{ActGFP}JMR2, Ser1</i>                                     | 42231           |
| Deficiency                    | <i>w[1118]; Df(3R)BSC193/TM6B, Tb[+]</i>                                                 | 9620            |
| Genomic rescue                | <i>w[1118]; Dp(3;2)GV-CH321-05H03, PBac{y[+mDint2] w[+mC]=GV-CH321-05H03}VK00037/CyO</i> | 90095           |
| <i>gpp</i> RNAi #1            | <i>y1 v1; P{TRiP.JF01284}attP2</i>                                                       | 31327           |
| <i>gpp</i> RNAi #2            | <i>y1 v1; P{TRiP.JF01283}attP2/TM3, Ser1</i>                                             | 31481           |
| <i>gpp</i> RNAi #3            | <i>y[1] sc[*] v[1] sev[21]; P{y[+t7.7] v[+t1.8]=TRiP.GL01325}attP2</i>                   | 41893           |
| <i>gpp</i> RNAi #4            | <i>y[1] v[1]; P{y[+t7.7] v[+t1.8]=TRiP.HMJ02129}attP40</i>                               | 42556           |
| Luciferase RNAi               | <i>y[1] v[1]; P{y[+t7.7] v[+t1.8]=TRiP.JF01355}attP2</i>                                 | 31603           |
| <i>ey-GAL4 (on II)</i>        | <i>w[*]; P{w[+m*]=GAL4-ey.H}3-8</i>                                                      | 5534            |
| <i>da-GAL4 (on III)</i>       | <i>w[*]; P{w[+mW.hs]=GAL4-da.G32}UH1, Sb[1]/TM6B, Tb[1]</i>                              | 55851           |
| <i>en-GAL4 (on II)</i>        | <i>w[1118]; P{w[+mW.hs]=en2.4-GAL4}e16E, P{w[+mC]=UAS-RFP.W}2/CyO</i>                    | 30557           |
| <i>act-GAL4 (on II)</i>       | <i>y[1] w[*]; P{w[+mC]=Act5C-GAL4}25FO1/CyO, y[+]</i>                                    | 4414            |
| <i>repo-GAL4 (on III)</i>     | <i>w[1118]; P{w[+m*]=GAL4}repo/TM3, Sb[1]</i>                                            | 7415            |
| UAS-mCherry. NLS (on II)      | <i>w[*]; P{w[+mC]=UAS-mCherry.NLS}2; MKRS/TM6B, Tb[1]</i>                                | 38425           |
| UAS-Empty (on II)             | <i>w[*]; P{w[+mC]=UAS}/CyO</i>                                                           |                 |
| <i>gpp</i> <sup>GS13895</sup> | <i>y[1] w[67c23]; P{w[+mC]=GSV6}GS13895/TM3, Sb[1] Ser[1]</i>                            | Kyoto<br>205608 |

**Table S5. Mutagenesis and qPCR primers used in this study**

| <b>Name</b>  | <b>Assay</b> | <b>Forward primer (5'-3')</b> | <b>Reverse primer (5'-3')</b> |
|--------------|--------------|-------------------------------|-------------------------------|
| p.Cys45Gly   | Mutagenesis  | CCGATGGGTCgGTGAAGAAATC        | ATGGTCTCGATGATTTTCATG         |
| p.Thr100Met  | Mutagenesis  | AAGCTGAACAtGCGGCCGTCC         | CATGGGCTGCGTGGTGCC            |
| p.Glu123Lys  | Mutagenesis  | GACCGACCCCaAGAAGCTCAA         | ACCGAGTGGTTGTAGACC            |
| p.Glu129Lys  | Mutagenesis  | CAACAACaAGCCCTTCTCCCC         | AGCTTCTCGGGGTCGGTC            |
| p.Arg292Cys  | Mutagenesis  | CACCATCATGtGCGTGGTGGAGC       | CCGATGTCACTCAAGTTTC           |
| p.Leu626Val  | Mutagenesis  | GAAGCAGGCCgTGAAGAGCCA         | TCCTTCAACAGCTTCTCCAG          |
| p.Lys1025Met | Mutagenesis  | GAGGCCAGCAiGGGAGACCTGCCC      | GGGCAACGGGCCCTGGGC            |
| qPrimer1     | qPCR         | ATCGTTGCATTGGAAAAAGG          | GTACGGCGGCATTGTAAACT          |
| qPrimer2     | qPCR         | CCATTGGAAGGTCTAGCAGC          | CTGCTGCACGTCTGTTGAC           |
| RpL32        | qPCR         | TAAGCTGTCGCACAAATGGCG         | AACGCGTCTGTCATGAGCA           |

**Table S7. Clinical features of individuals with suspected non-diagnostic variants in *DOT1L***

| <b>Individual</b>                                | <b>10</b>                 | <b>11</b>                                                                                                     |
|--------------------------------------------------|---------------------------|---------------------------------------------------------------------------------------------------------------|
| <b><i>DOT1L</i> variant (NM_032482.3)</b>        | c.874C>T<br>p.Arg292Cys   | c.1352A>G<br>p.Asp451Gly                                                                                      |
| <b>Inheritance</b>                               | <i>de novo</i>            | Inherited from unaffected father                                                                              |
| <b>Sex</b>                                       | Female                    | Female                                                                                                        |
| <b>Age at last assessment</b>                    | 11 years                  | 11 months                                                                                                     |
| <b>Medical History</b>                           |                           |                                                                                                               |
| <b>Brain anomalies (MRI/ CT)</b>                 | N/A                       | N/A                                                                                                           |
| <b>Cardiac Anomalies</b>                         | No                        | No                                                                                                            |
| <b>Hypotonia</b>                                 | No                        | No                                                                                                            |
| <b>Musculoskeletal anomalies</b>                 | No                        | Yes<br>Torticollis<br>flexible hips, leg length discrepancy,<br>right sided weakness with facial<br>asymmetry |
| <b>Urogenital anomalies</b>                      | No                        | No                                                                                                            |
| <b>Hearing loss</b>                              | No                        | Yes                                                                                                           |
| <b>Ophthalmological anomalies</b>                | No                        | Yes<br>Amblyopia, anisometropia                                                                               |
| <b>Growth and Development</b>                    |                           |                                                                                                               |
| <b>Global developmental delay</b>                | Yes                       | -                                                                                                             |
| <b>Intellectual Disability</b>                   | Yes                       | -                                                                                                             |
| <b>Language</b>                                  | Non-verbal                | Speech delay, articulation concern                                                                            |
| <b>Height percentile</b>                         | 27.8%                     | 3.3%                                                                                                          |
| <b>Microcephaly (percentile)</b>                 | No<br>(10 <sup>th</sup> ) | No<br>(63 <sup>rd</sup> )                                                                                     |
| Abbreviations are as follows: N/A: Not available |                           |                                                                                                               |

**Table S8. Summary of variant details, allele frequencies and *in-silico* predictions for all *DOT1L* variants reported in our study**

| Variant Details                                     |                                    |                                       |                                       |                                       |                                       |                                       |                                       |                                       |                                       |
|-----------------------------------------------------|------------------------------------|---------------------------------------|---------------------------------------|---------------------------------------|---------------------------------------|---------------------------------------|---------------------------------------|---------------------------------------|---------------------------------------|
| <b>Type</b>                                         | Missense                           | Missense                              | Missense                              | Missense                              | Missense                              | Missense                              | Missense                              | Missense                              | Missense                              |
| <b>g. coordinates [GRCh37 (Chr19)]</b>              | g.2185861T>G                       | g.2191045C>T                          | g.2191113G>A                          | g.2191131G>A                          | g.2207590C>T                          | g.2211098A>G                          | g.2214548C>G                          | g.2217783C>T                          | g.2222242A>T                          |
| <b>c. variant (NM_032482.3)</b>                     | c.133T>G                           | c.299C>T                              | c.367G>A                              | c.385G>A                              | c.874C>T                              | c.1352A>G                             | c.1876C>G                             | c.2557C>T                             | c.3074A>T                             |
| <b>p. variant (NP_115871.1)</b>                     | p.Cys45Gly                         | p.Thr100Met                           | p.Glu123Lys                           | p.Glu129Lys                           | p.Arg292Cys                           | p.Asp451Gly                           | p.Leu626Val                           | p.Arg853Cys                           | p.Lys1025Met                          |
| Variant Allele Frequencies (searched December 2022) |                                    |                                       |                                       |                                       |                                       |                                       |                                       |                                       |                                       |
| <b>gnomAD v2.1.1</b>                                | 0                                  | 0                                     | 0                                     | 0                                     | 0                                     | 31                                    | 0                                     | 0                                     | 1                                     |
| <b>gnomAD v3.1.2</b>                                | 0                                  | 0                                     | 0                                     | 0                                     | 0                                     | 19                                    | 0                                     | 0                                     | 0                                     |
| <b>TOPMed Bravo</b>                                 | 0                                  | 0                                     | 0                                     | 0                                     | 0                                     | 1                                     | 0                                     | 2                                     | 0                                     |
| <b>deCAF</b>                                        | 0                                  | 2                                     | 0                                     | 0                                     | 0                                     | 97                                    | 0                                     | 0                                     | 0                                     |
| <i>In Silico</i> Predictions & Conservation Metrics |                                    |                                       |                                       |                                       |                                       |                                       |                                       |                                       |                                       |
| <b>Aggregated Prediction (Franklin)</b>             | Deleterious (0.71)                 | Benign (0.12)                         | Uncertain (0.55)                      | Uncertain (0.55)                      | Uncertain (0.36)                      | Benign (0.09)                         | Uncertain (0.29)                      | Uncertain (0.41)                      | Benign (0.07)                         |
| <b>Revel</b>                                        | Deleterious (Supporting) (0.67)    | Benign (Moderate) (0.12)              | Uncertain (0.47)                      | Uncertain (0.47)                      | Benign (Supporting) (0.24)            | Benign (Moderate) (0.09)              | Benign (Moderate) (0.17)              | Uncertain (0.31)                      | Benign (Moderate) (0.07)              |
| <b>Varity</b>                                       | Deleterious (0.96)                 | Deleterious (low) (0.43)              | Deleterious (0.84)                    | Deleterious (0.72)                    | Deleterious (0.64)                    | Benign (0.08)                         | Benign (low) (0.28)                   | Deleterious (low) (0.44)              | Benign (low) (0.25)                   |
| <b>MutationAssessor</b>                             | Low deleterious probability (1.83) | Medium deleterious probability (1.94) | Medium deleterious probability (1.98) | Medium deleterious probability (1.99) | Medium deleterious probability (2.09) | Medium deleterious probability (2.05) | Medium deleterious probability (1.96) | Medium deleterious probability (2.33) | Medium deleterious probability (1.98) |
| <b>FATHMM</b>                                       | Uncertain (1.93)                   | Uncertain (2.06)                      | Uncertain (2.02)                      | Uncertain (2.05)                      | Uncertain (1.95)                      | Uncertain (1.81)                      | Uncertain (1.5)                       | Uncertain (1.39)                      | Uncertain (1.68)                      |

|                                                                 |                                                               |                                                       |                                                               |                                                               |                                                               |                                                                 |                                                     |                                                                 |                                                                 |
|-----------------------------------------------------------------|---------------------------------------------------------------|-------------------------------------------------------|---------------------------------------------------------------|---------------------------------------------------------------|---------------------------------------------------------------|-----------------------------------------------------------------|-----------------------------------------------------|-----------------------------------------------------------------|-----------------------------------------------------------------|
| <b>MetaLR</b>                                                   | Benign (low)<br>(0.15)                                        | Benign<br>(0.13)                                      | Benign<br>(0.11)                                              | Benign<br>(0.11)                                              | Benign<br>(0.05)                                              | Benign (low)<br>(0.25)                                          | Benign (low)<br>(0.17)                              | Benign (low)<br>(0.17)                                          | Benign<br>(0.15)                                                |
| <b>BayesDel</b>                                                 | Uncertain<br>(0.09)                                           | Benign<br>(Supporting)<br>(-0.35)                     | Uncertain<br>(-0.11)                                          | Uncertain<br>(-0.14)                                          | Uncertain<br>(-0.06)                                          | Benign<br>(Moderate)<br>(-0.43)                                 | Benign<br>(Supporting)<br>(-0.35)                   | Uncertain<br>(-0.17)                                            | Benign<br>(Moderate)<br>(-0.43)                                 |
| <b>CADD</b>                                                     | Phred: 27.0<br>Raw score:<br>3.912343                         | Phred: 25.4<br>Raw score:<br>3.620297                 | Phred: 29.2<br>Raw score:<br>4.170345                         | Phred: 26.0<br>Raw score:<br>3.745109                         | Phred: 24.7<br>Raw score:<br>3.406433                         | Phred: 25.6<br>Raw score:<br>3.652334                           | Phred: 23.8<br>Raw score:<br>3.080506               | Phred: 24.8<br>Raw score:<br>3.453433                           | Phred: 23.0<br>Raw score:<br>2.738641                           |
| <b>Metadome</b>                                                 | Tolerance<br>score<br>(dn/ds): 0.07<br>(highly<br>intolerant) | Tolerance<br>score<br>(dn/ds): 0.4<br>(intolerant)    | Tolerance<br>score<br>(dn/ds): 0.06<br>(highly<br>intolerant) | Tolerance<br>score<br>(dn/ds): 0.06<br>(highly<br>intolerant) | Tolerance<br>score<br>(dn/ds): 0.12<br>(highly<br>intolerant) | Tolerance<br>score<br>(dn/ds): 0.62<br>(slightly<br>intolerant) | Tolerance<br>score<br>(dn/ds): 0.34<br>(intolerant) | Tolerance<br>score<br>(dn/ds): 0.58<br>(slightly<br>intolerant) | Tolerance<br>score<br>(dn/ds): 0.62<br>(slightly<br>intolerant) |
| <b>Grantham<br/>distance</b>                                    | Large<br>physicoche<br>mical<br>difference<br>(159)           | Moderate<br>physicoche<br>mical<br>difference<br>(81) | Small<br>physicoche<br>mical<br>difference<br>(56)            | Small<br>physicoche<br>mical<br>difference<br>(56)            | Large<br>physicoche<br>mical<br>difference<br>(180)           | Moderate<br>physicoche<br>mical<br>difference<br>(94)           | Small<br>physicoche<br>mical<br>difference<br>(32)  | Large<br>physicoche<br>mical<br>difference<br>(180)             | Moderate<br>physicoche<br>mical<br>difference<br>(95)           |
| <b>GERP</b>                                                     | Uncertain<br>(4.68)                                           | Uncertain<br>(4.75)                                   | Uncertain<br>(4.75)                                           | Uncertain<br>(4.75)                                           | Uncertain<br>(3.63)                                           | Uncertain<br>(3.62)                                             | Uncertain<br>(3.96)                                 | Uncertain<br>(4.15)                                             | Uncertain<br>(3.49)                                             |
| <b>Amino acid<br/>residue<br/>conservation (13<br/>species)</b> | Highly<br>conserved<br>(11/13)                                | Moderately<br>conserved<br>(8/13)                     | Highly<br>conserved<br>(11/13)                                | Highly<br>conserved<br>(11/13)                                | Moderately<br>conserved<br>(10/13)                            | Moderately<br>conserved<br>(9/13)                               | Moderately<br>conserved<br>(10/13)                  | Moderately<br>conserved<br>(9/13)                               | Moderately<br>conserved<br>(8/13)                               |
| <b>PhyloP</b>                                                   | Moderately<br>conserved<br>nucleotide<br>(7.08)               | Moderately<br>conserved<br>nucleotide<br>(5.64)       | Highly<br>conserved<br>nucleotide<br>(9.17)                   | Highly<br>conserved<br>nucleotide<br>(9.17)                   | Weakly<br>conserved<br>nucleotide<br>(2.94)                   | Moderately<br>conserved<br>nucleotide<br>(6.78)                 | Weakly<br>conserved<br>nucleotide<br>(2.83)         | Weakly<br>conserved<br>nucleotide<br>(2.29)                     | Weakly<br>conserved<br>nucleotide<br>(1.45)                     |

## **Consortia**

### **Undiagnosed Diseases Network**

Maria T. Acosta, Margaret Adam, David R. Adams, Justin Alvey, Laura Amendola, Ashley Andrews, Euan A. Ashley, Mahshid S. Azamian, Carlos A. Bacino, Guney Bademci, Ashok Balasubramanyam, Dustin Baldrige, Jim Bale, Michael Bamshad, Deborah Barbouth, Pinar Bayrak-Toydemir, Anita Beck, Alan H. Beggs, Edward Behrens, Gill Bejerano, Hugo J. Bellen, Jimmy Bennet, Beverly Berg-Rood, Jonathan A. Bernstein, Gerard T. Berry, Anna Bican, Stephanie Bivona, Elizabeth Blue, John Bohnsack, Devon Bonner, Lorenzo Botto, Brenna Boyd, Lauren C. Briere, Elly Brokamp, Gabrielle Brown, Elizabeth A. Burke, Lindsay C. Burrage, Manish J. Butte, Peter Byers, William E. Byrd, John Carey, Olveen Carrasquillo, Thomas Cassini, Ta Chen Peter Chang, Sirisak Chanprasert, Hsiao-Tuan Chao, Gary D. Clark, Terra R. Coakley, Laurel A. Cobban, Joy D. Cogan, Matthew Coggins, F. Sessions Cole, Heather A. Colley, Cynthia M. Cooper, Heidi Cope, William J. Craigen, Andrew B. Crouse, Michael Cunningham, Precilla D'Souza, Hongzheng Dai, Surendra Dasari, Joie Davis, Jyoti G. Dayal, Matthew Deardorff, Esteban C. Dell'Angelica, Katrina Dipple, Daniel Doherty, Naghmeh Dorrani, Argenia L. Doss, Emilie D. Douine, Laura Duncan, Dawn Earl, David J. Eckstein, Lisa T. Emrick, Christine M. Eng, Cecilia Esteves, Marni Falk, Liliana Fernandez, Elizabeth L. Fieg, Paul G. Fisher, Brent L. Fogel, Irman Forghani, William A. Gahl, Ian Glass, Bernadette Gochuico, Rena A. Godfrey, Katie Golden-Grant, Madison P. Goldrich, Alana Grajewski, Irma Gutierrez, Don Hadley, Sihoun Hahn, Rizwan Hamid, Kelly Hassey, Nichole Hayes, Frances High, Anne Hing, Fuki M. Hisama, Ingrid A. Holm, Jason Hom, Martha Horike-Pyne, Alden Huang, Yong Huang, Wendy Introne, Rosario Isasi, Kosuke Izumi, Fariha Jamal, Gail P. Jarvik, Jeffrey Jarvik, Suman Jayadev, Orpa Jean-Marie, Vaidehi Jobanputra, Lefkothea Karaviti, Jennifer Kennedy, Shamika Ketkar, Dana Kiley, Gonench Kilich, Shilpa N. Kobren, Isaac S. Kohane, Jennefer N. Kohler, Deborah Krakow, Donna M. Krasnewich, Elijah Kravets, Susan Korrick, Mary Koziura, Seema R. Lalani, Byron Lam, Christina Lam, Grace L. LaMoure, Brendan C. Lanpher, Ian R. Lanza, Kimberly LeBlanc, Brendan H. Lee, Roy Levitt, Richard A. Lewis, Pengfei Liu, Xue Zhong Liu, Nicola Longo, Sandra K. Loo, Joseph Loscalzo, Richard L. Maas, Ellen F. Macnamara, Calum

A. MacRae, Valerie V. Maduro, Rachel Mahoney, Bryan C. Mak, May Christine V. Malicdan, Laura A. Mamounas, Teri A. Manolio, Rong Mao, Kenneth Maravilla, Ronit Marom, Gabor Marth, Beth A. Martin, Martin G. Martin, Julian A. Martínez-Agosto, Shruti Marwaha, Jacob McCauley, Allyn McConkie-Rosell, Alexa T. McCray, Elisabeth McGee, Heather Mefford, J. Lawrence Merritt, Matthew Might, Ghayda Mirzaa, Eva Morava, Paolo M. Moretti, Mariko Nakano-Okuno, Stan F. Nelson, John H. Newman, Sarah K. Nicholas, Deborah Nickerson, Shirley Nieves-Rodriguez, Donna Novacic, Devin Oglesbee, James P. Orenge, Laura Pace, Stephen Pak, J. Carl Pallais, Christina G.S. Palmer, Jeanette C. Papp, Neil H. Parker, John A. Phillips III, Jennifer E. Posey, Lorraine Potocki, Barbara N. Pusey, Aaron Quinlan, Wendy Raskind, Archana N. Raja, Deepak A. Rao, Anna Raper, Genecee Renteria, Chloe M. Reuter, Lynette Rives, Amy K. Robertson, Lance H. Rodan, Jill A. Rosenfeld, Natalie Rosenwasser, Francis Rossignol, Maura Ruzhnikov, Ralph Sacco, Jacinda B. Sampson, Mario Saporta, Judy Schaechter, Timothy Schedl, Kelly Schoch, C. Ron Scott, Daryl A. Scott, Vandana Shashi, Jimann Shin, Edwin K. Silverman, Janet S. Sinsheimer, Kathy Sisco, Edward C. Smith, Kevin S. Smith, Emily Solem, Lilianna Solnica- Krezel, Ben Solomon, Rebecca C. Spillmann, Joan M. Stoler, Jennifer A. Sullivan, Kathleen Sullivan, Angela Sun, Shirley Sutton, David A. Sweetser, Virginia Sybert, Holly K. Tabor, Amelia L. M. Tan, Queenie K.-G. Tan, Mustafa Tekin, Fred Telischi, Willa Thorson, Cynthia J. Tifft, Camilo Toro, Alyssa A. Tran, Brianna M. Tucker, Tiina K. Urv, Adeline Vanderver, Matt Velinder, Dave Viskochil, Tiphonie P. Vogel, Colleen E. Wahl, Melissa Walker, Stephanie Wallace, Nicole M. Walley, Jennifer Wambach, Jijun Wan, Lee-kai Wang, Michael F. Wangler, Patricia A. Ward, Daniel Wegner, Monika Weisz-Hubshman, Mark Wener, Tara Wenger, Katherine Wesseling Perry, Monte Westerfield, Matthew T. Wheeler, Jordan Whitlock, Lynne A. Wolfe, Kim Worley, Changrui Xiao, Shinya Yamamoto, John Yang, Diane B. Zastrow, Zhe Zhang, Chunli Zhao, Stephan Zuchner



## SUPPLEMENTARY REFERENCES

1. Liu, H., Liu, D.T., Lan, S., Yang, Y., Huang, J., Huang, J., and Fang, L. (2021). ASH1L mutation caused seizures and intellectual disability in twin sisters. *J. Clin. Neurosci.* 91, 69–74. 10.1016/J.JOCN.2021.06.038.
2. Kleefstra, T., Van Zelst-Stams, W.A., Nillesen, W.M., Cormier-Daire, V., Houge, G., Foulds, N., Van Dooren, M., Willemsen, M.H., Pfundt, R., Turner, A., et al. (2009). Further clinical and molecular delineation of the 9q subtelomeric deletion syndrome supports a major contribution of EHMT1 haploinsufficiency to the core phenotype. *J. Med. Genet.* 46, 598–606. 10.1136/jmg.2008.062950.
3. Goodman, S.J., Cytrynbaum, C., Chung, B.H.-Y., Chater-Diehl, E., Aziz, C., Turinsky, A.L., Kellam, B., Keller, M., Ko, J.M., Caluseriu, O., et al. (2020). EHMT1 pathogenic variants and 9q34.3 microdeletions share altered DNA methylation patterns in patients with Kleefstra syndrome. *J. Transl. Genet. Genomics* 4, 144–158. 10.20517/jtgg.2020.23.
4. Gibson, W.T., Hood, R.L., Zhan, S.H., Bulman, D.E., Fejes, A.P., Moore, R., Mungall, A.J., Eydoux, P., Babul-Hirji, R., An, J., et al. (2012). Mutations in EZH2 cause weaver syndrome. *Am. J. Hum. Genet.* 90, 110–118. 10.1016/j.ajhg.2011.11.018.
5. Choufani, S., Gibson, W.T., Turinsky, A.L., Chung, B.H.Y., Wang, T., Garg, K., Vitriolo, A., Cohen, A.S.A., Cyrus, S., Goodman, S., et al. (2020). DNA Methylation Signature for EZH2 Functionally Classifies Sequence Variants in Three PRC2 Complex Genes. *Am. J. Hum. Genet.* 106, 596–610. 10.1016/j.ajhg.2020.03.008.
6. Jones, W.D., Dafou, D., McEntagart, M., Woollard, W.J., Elmslie, F. V., Holder-Espinasse, M., Irving, M., Saggart, A.K., Smithson, S., Trembath, R.C., et al. (2012). De novo mutations in MLL cause Wiedemann-Steiner syndrome. *Am. J. Hum. Genet.* 91, 358–364. 10.1016/j.ajhg.2012.06.008.
7. Foroutan, A., Haghshenas, S., Bhai, P., Levy, M.A., Kerkhof, J., McConkey, H., Niceta, M., Ciolfi, A., Pedace, L., Miele, E., et al. (2022). Clinical Utility of a Unique Genome-Wide DNA Methylation Signature for KMT2A-Related Syndrome. *Int. J. Mol. Sci.* 23, 1815. 10.3390/ijms23031815.
8. Zech, M., Boesch, S., Maier, E.M., Borggraefe, I., Vill, K., Laccone, F., Pilshofer, V., Ceballos-Baumann, A., Alhaddad, B., Berutti, R., et al. (2016). Haploinsufficiency of KMT2B, Encoding the Lysine-Specific Histone Methyltransferase 2B, Results in Early-Onset Generalized Dystonia. *Am. J. Hum. Genet.* 99, 1377–1387. 10.1016/j.ajhg.2016.10.010.

9. Mirza-Schreiber, N., Zech, M., Wilson, R., Brunet, T., Wagner, M., Jech, R., Boesch, S., Škorvánek, M., Necpál, J., Weise, D., et al. (2022). Blood DNA methylation provides an accurate biomarker of KMT2B-related dystonia and predicts onset. *Brain* 145, 644–654. 10.1093/BRAIN/AWAB360.
10. Lee, S., Ochoa, E., Barwick, K., Cif, L., Rodger, F., Docquier, F., Pérez-Dueñas, B., Clark, G., Martin, E., Banka, S., et al. (2022). Comparison of methylation epigenatures in KMT2B-and KMT2D-related human disorders. *Epigenomics* 14, 537–547. 10.2217/epi-2021-0521.
11. Cif, L., Demailly, D., Lin, J.P., Barwick, K.E., Sa, M., Abela, L., Malhotra, S., Chong, W.K., Steel, D., Sanchis-Juan, A., et al. (2020). KMT2B-related disorders: Expansion of the phenotypic spectrum and long-term efficacy of deep brain stimulation. *Brain* 143, 3242–3261. 10.1093/brain/awaa304.
12. Koemans, T.S., Kleefstra, T., Chubak, M.C., Stone, M.H., Reijnders, M.R.F., de Munnik, S., Willemsen, M.H., Fenckova, M., Stumpel, C.T.R.M., Bok, L.A., et al. (2017). Functional convergence of histone methyltransferases EHMT1 and KMT2C involved in intellectual disability and autism spectrum disorder. *PLoS Genet.* 13, e1006864. 10.1371/journal.pgen.1006864.
13. Cuvertino, S., Hartill, V., Colyer, A., Garner, T., Nair, N., Al-Gazali, L., Canham, N., Faundes, V., Flinter, F., Hertecant, J., et al. (2020). A restricted spectrum of missense KMT2D variants cause a multiple malformations disorder distinct from Kabuki syndrome. *Genet. Med.* 22, 980. 10.1038/s41436-020-0784-7.
14. Baldridge, D., Spillmann, R.C., Wegner, D.J., Wambach, J.A., White, F. V., Sisco, K., Toler, T.L., Dickson, P.I., Sessions Cole, F, et al. (2020). Phenotypic expansion of KMT2D-related disorder: Beyond Kabuki syndrome. *Am J Med Genet A.* 182(5):1053-1065. 10.1002/ajmg.a.61518.
15. Butcher, D.T., Cytrynbaum, C., Turinsky, A.L., Siu, M.T., Inbar-Feigenberg, M., Mendoza-Londono, R., Chitayat, D., Walker, S., Machado, J., Caluseriu, O., et al. (2017). CHARGE and Kabuki Syndromes: Gene-Specific DNA Methylation Signatures Identify Epigenetic Mechanisms Linking These Clinically Overlapping Conditions. *Am. J. Hum. Genet.* 100, 773–788. 10.1016/j.ajhg.2017.04.004.
16. Ng, S.B., Bigham, A.W., Buckingham, K.J., Hannibal, M.C., McMillin, M.J., Gildersleeve, H.I., Beck, A.E., Tabor, H.K., Cooper, G.M., Mefford, H.C., et al. (2010). Exome sequencing identifies MLL2 mutations as a cause of Kabuki syndrome. *Nat. Genet.* 42, 790–793. 10.1038/ng.646.

17. O'Donnell-Luria, A.H., Pais, L.S., Faundes, V., Wood, J.C., Sveden, A., Luria, V., Abou Jamra, R., Accogli, A., Amburgey, K., Anderlid, B.M., et al. (2019). Heterozygous Variants in KMT2E Cause a Spectrum of Neurodevelopmental Disorders and Epilepsy. *Am. J. Hum. Genet.* 104, 1210–1222. 10.1016/j.ajhg.2019.03.021.
18. Niihori, T., Ouchi-Uchiyama, M., Sasahara, Y., Kaneko, T., Hashii, Y., Irie, M., Sato, A., Saito-Nanjo, Y., Funayama, R., Nagashima, T., et al. (2015). Mutations in MECOM, Encoding Oncoprotein EVI1, Cause Radioulnar Synostosis with Amegakaryocytic Thrombocytopenia. *Am. J. Hum. Genet.* 97, 848–854. 10.1016/j.ajhg.2015.10.010.
19. Kurotaki, N., Imaizumi, K., Harada, N., Masuno, M., Kondoh, T., Nagai, T., Ohashi, H., Naritomi, K., Tsukahara, M., Makita, Y., et al. (2002). Haploinsufficiency of NSD1 causes Sotos syndrome. *Nat. Genet.* 30, 365–366. 10.1038/ng863.
20. Choufani, S., Cytrynbaum, C., Chung, B.H.Y., Turinsky, A.L., Grafodatskaya, D., Chen, Y.A., Cohen, A.S.A., Dupuis, L., Butcher, D.T., Siu, M.T., et al. (2015). NSD1 mutations generate a genome-wide DNA methylation signature. *Nat. Commun.* 2015 6:1–7. 10.1038/ncomms10207.
21. Lozier, E.R., Konovalov, F.A., Kanivets, I. V., Pyankov, D. V., Koshkin, P.A., Baleva, L.S., Sipyagina, A.E., Yakusheva, E.N., Kuchina, A.E., and Korostelev, S.A. (2018). De novo nonsense mutation in WHSC1 (NSD2) in patient with intellectual disability and dysmorphic features. *J. Hum. Genet.* 63, 919–922. 10.1038/s10038-018-0464-5.
22. Kawai, T., Kinoshita, S., Takayama, Y., Onishi, E., Kamura, H., Kojima, K., Kikuchi, H., Terao, M., Sugawara, T., Migita, O., et al. (2023). DNA methylation signature in NSD2 loss-of-function variants appeared similar to that in Wolf-Hirschhorn syndrome. *bioRxiv*, 2023.01.06.522834. 10.1101/2023.01.06.522834.
23. Li, N., Subrahmanyam, L., Smith, E., Yu, X., Zaidi, S., Choi, M., Mane, S., Nelson-Williams, C., Bahjati, M., Kazemi, M., et al. (2016). Mutations in the Histone Modifier PRDM6 Are Associated with Isolated Nonsyndromic Patent Ductus Arteriosus. *Am. J. Hum. Genet.* 98, 1082–1091. 10.1016/j.ajhg.2016.03.022.
24. Arndt, A.K., Schafer, S., Drenckhahn, J.D., Sabeh, M.K., Plovie, E.R., Caliebe, A., Klopocki, E., Musso, G., Werdich, A.A., Kalwa, H., et al. (2013). Fine mapping of the 1p36 deletion syndrome identifies mutation of PRDM16 as a cause of cardiomyopathy. *Am. J. Hum. Genet.* 93, 67–77. 10.1016/j.ajhg.2013.05.015.
25. Yu, X., Yang, L., Li, J., Li, W., Li, D., Wang, R., Wu, K., Chen, W., Zhang, Y., Qiu, Z., et al. (2019). De Novo and Inherited SETD1A Variants in Early-onset Epilepsy. *Neurosci. Bull.* 35, 1045–1057. 10.1007/s12264-019-00400-w.

26. Kummeling, J., Stremmelaar, D.E., Raun, N., Reijnders, M.R.F., Willemsen, M.H., Ruitkamp-Versteeg, M., Schepens, M., Man, C.C.O., Gilissen, C., Cho, M.T., et al. (2021). Characterization of SETD1A haploinsufficiency in humans and *Drosophila* defines a novel neurodevelopmental syndrome. *Mol. Psychiatry* 26, 2013–2024. 10.1038/s41380-020-0725-5.
27. Hiraide, T., Nakashima, M., Yamoto, K., Fukuda, T., Kato, M., Ikeda, H., Sugie, Y., Aoto, K., Kaname, T., Nakabayashi, K., et al. (2018). De novo variants in SETD1B are associated with intellectual disability, epilepsy and autism. *Hum. Genet.* 137, 95–104. 10.1007/s00439-017-1863-y.
28. Krzyzewska, I.M., Maas, S.M., Henneman, P., Lip, K. V.D., Venema, A., Baranano, K., Chassevent, A., Aref-Eshghi, E., Van Essen, A.J., Fukuda, T., et al. (2019). A genome-wide DNA methylation signature for SETD1B-related syndrome. *Clin. Epigenetics* 11, 1–15. 10.1186/S13148-019-0749-3/FIGURES/6.
29. Rabin, R., Radmanesh, A., Glass, I.A., Dobyns, W.B., Aldinger, K.A., Shieh, J.T., Romoser, S., Bombei, H., Dowsett, L., Trapane, P., et al. (2020). Genotype-phenotype correlation at codon 1740 of SETD2. *Am. J. Med. Genet. A* 182, 2037–2048. 10.1002/AJMG.A.61724.
30. Luscan, A., Laurendeau, I., Malan, V., Francannet, C., Odent, S., Giuliano, F., Lacombe, D., Touraine, R., Vidaud, M., Pasmant, E., et al. (2014). Mutations in SETD2 cause a novel overgrowth condition. *J. Med. Genet.* 51, 512–517. 10.1136/jmedgenet-2014-102402.
31. Lumish, H.S., Wynn, J., Devinsky, O., and Chung, W.K. (2015). Brief Report: SETD2 Mutation in a Child with Autism, Intellectual Disabilities and Epilepsy. *J. Autism Dev. Disord.* 45, 3764–3770. 10.1007/s10803-015-2484-8.
